# Supplementary material for: Cell Penetrating Peptide as a High Safety Anti-Inflammation Ingredient for Cosmetic Applications
Source: PubMed Central journal article supplement (PMC7023394; doi:10.3390/biom10010101), 2020-01-07
Supplement: biomolecules-10-00101-s001.pdf [file biomolecules-10-00101-s001.pdf]

Supplementary Materials

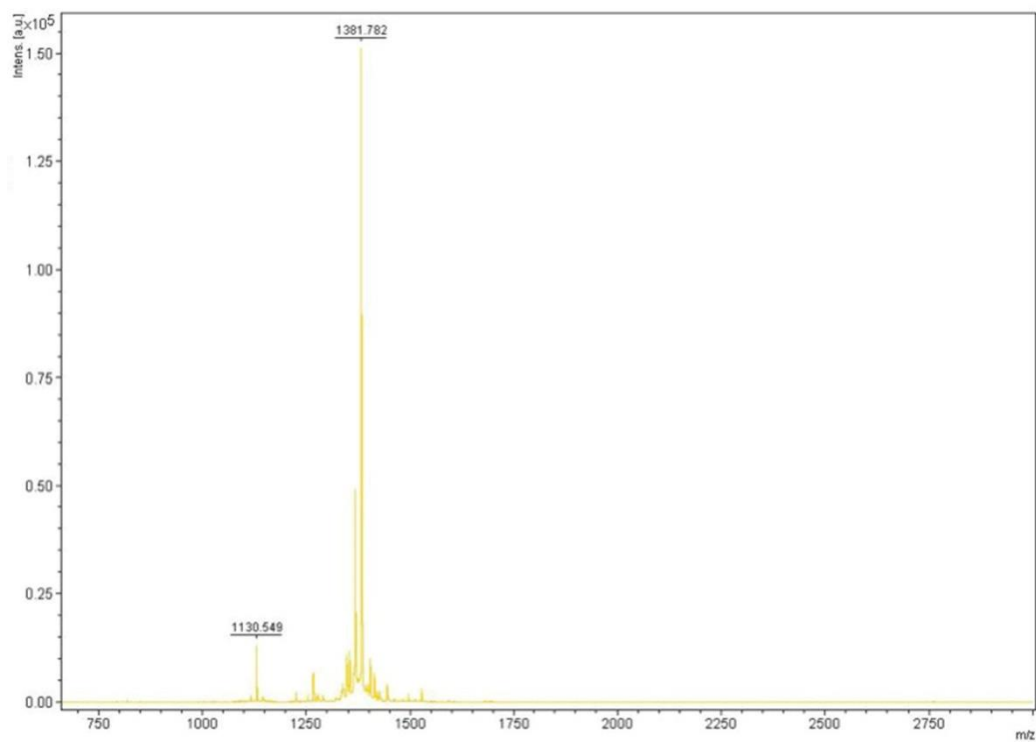

Figure S1 MALDI-TOF mass profile of CPP<sub>AIF</sub>.

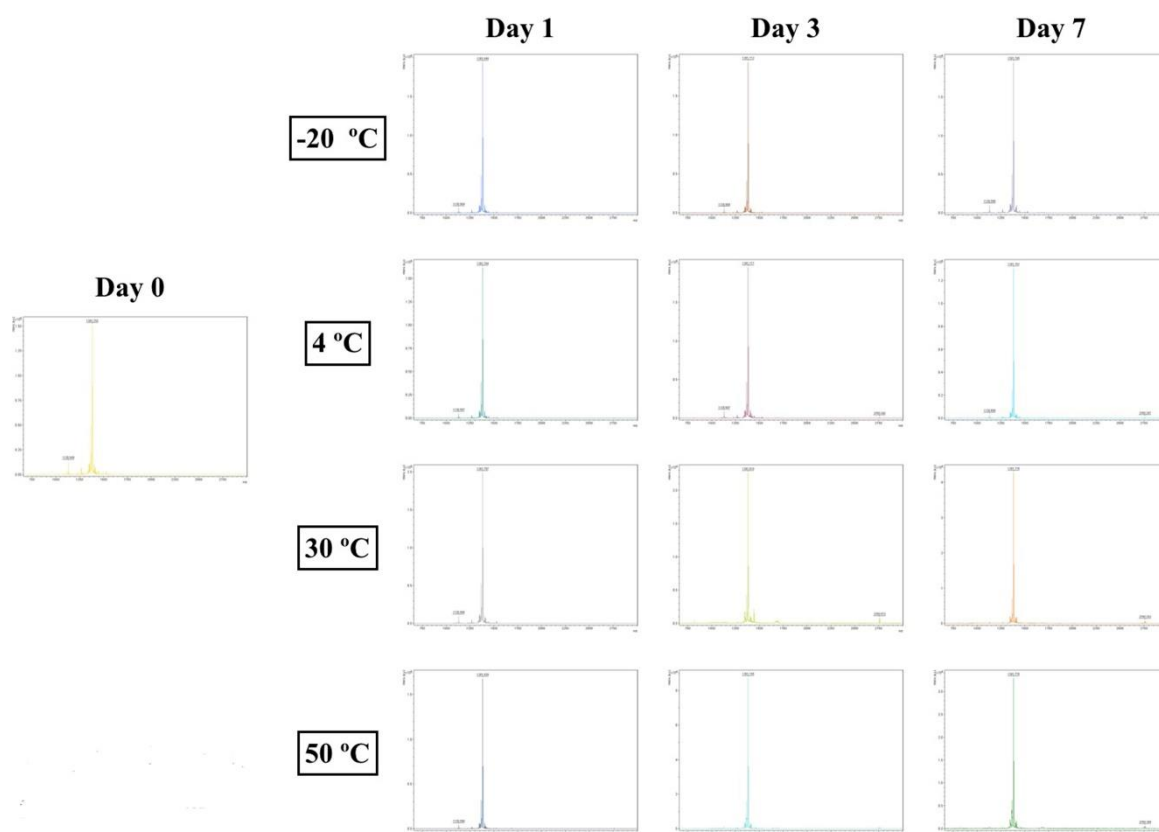

Figure S2 MALDI-TOF mass profile of CPP<sub>AIF</sub> in water under different temperature for 1, 3 and 7 days. CPP<sub>AIF</sub> was dissolved in water at various temperature (-20 °C, 4 °C, 30 °C, 50 °C) for different duration and characterized by mass spectrometry.

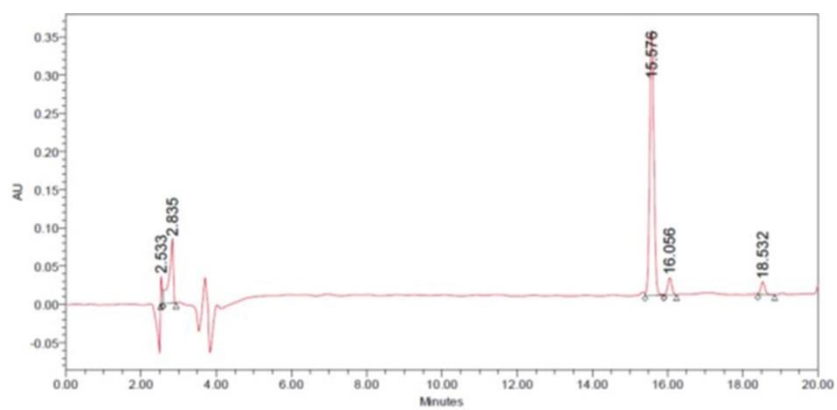

(A)

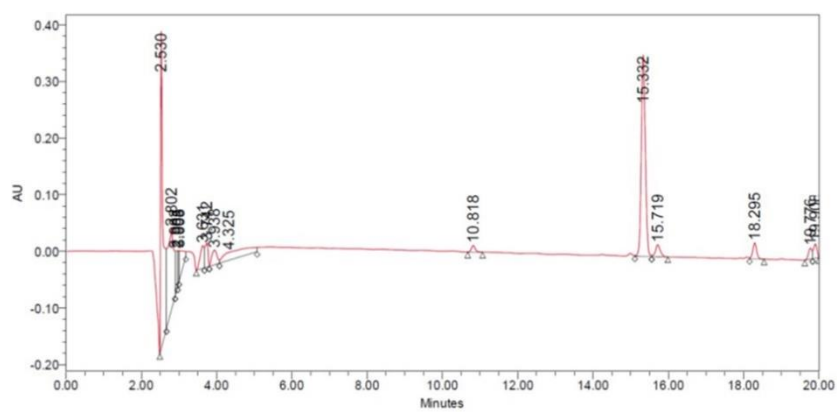

(B)

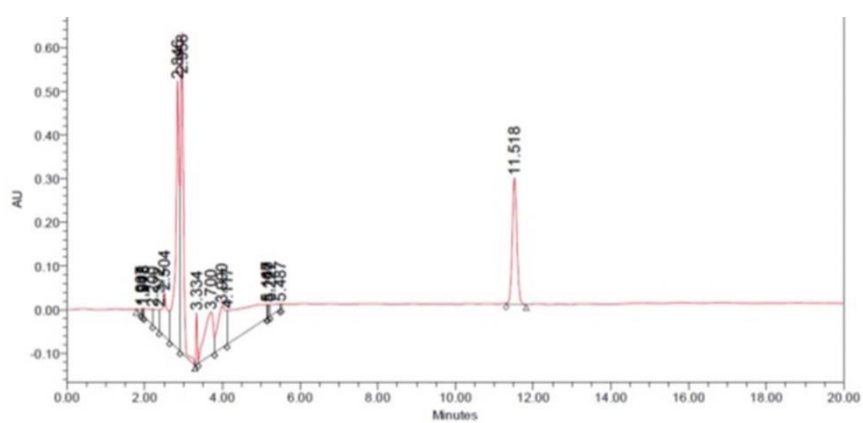

(C)

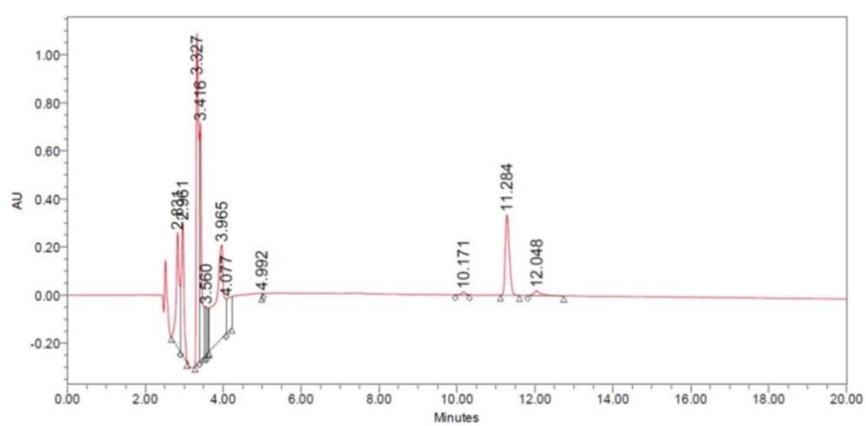

(D)

Figure S3 The HPLC chromatograms for cysteine and lysine depletion quantification of CPP<sub>AIF</sub>. (A) cysteine only; (B) CPP<sub>AIF</sub> with cysteine; (C) lysine only; (D) CPP<sub>AIF</sub> with lysine.

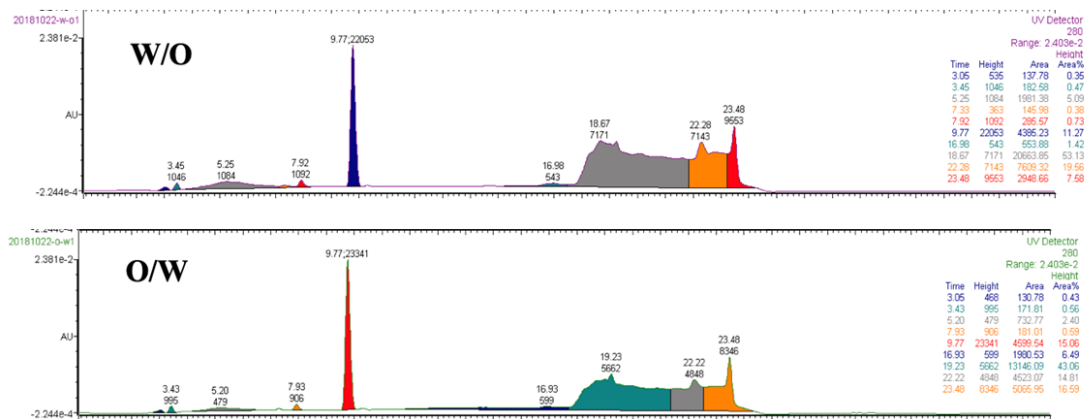

Figure S4 HPLC chromatogram of CPP<sub>AIF</sub> in different formulations applied in reconstructed human epidermis tissue model. W/O: CPP<sub>AIF</sub> in W/O formulation; O/W: CPP<sub>AIF</sub> in O/W formulation.

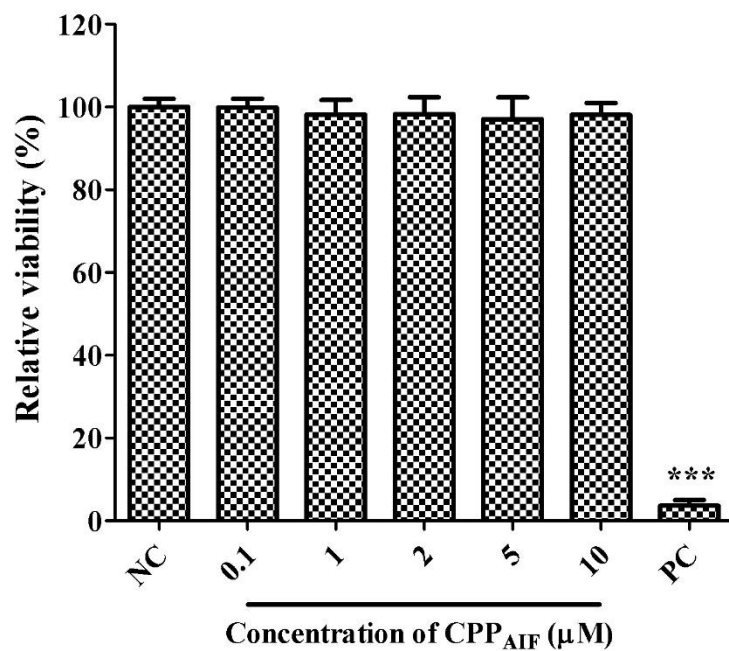

Figure S5 Cytotoxicity test of CPP<sub>AIF</sub> to HaCaT cells. HaCaT cells ( $1 \times 10^3$ ) were seeded in 96-well plate and incubated at 37 °C for 16 h. The cells were then incubated different concentrations of CPP<sub>AIF</sub> for 2 h. The cells were washed with PBS and cell viability was measured by AlamarBlue cell viability assay. PBS was applied as negative control (NC) set as 100% (mock) and 5% SDS was applied as positive control (PC). \*\*\*  $p < 0.001$  versus the NC.

Table S1 O/W formulation content

| Trade Name           | INCI Name                                                                                                        | %       |
|----------------------|------------------------------------------------------------------------------------------------------------------|---------|
| Aqua                 | Aqua                                                                                                             | qsp 100 |
| Glycerine 4812       | Glycerin                                                                                                         | 10      |
| Purolan PE           | Phenoxyethanol                                                                                                   | 0.8     |
| Dermosoft®<br>Octiol | Caprylyl Glycol                                                                                                  | 0.2     |
| Mihacol 139          | Sodium Acrylate/Sodium Acryloyldimethyl Taurate<br>Copolymer, Mineral Oil (Paraffinum Liquidum)& Trideceth-<br>6 | 1       |
| Cordamol<br>GTIS     | Triisostearin                                                                                                    | 10      |

Table S2 W/O formulation content

| Trade Name                                   | INCI Name                                                  | %       |
|----------------------------------------------|------------------------------------------------------------|---------|
| Aqua                                         | Aqua                                                       | qsp 100 |
| Glycerine 4812                               | Glycerin                                                   | 10      |
| Purolan PE                                   | Phenoxyethanol                                             | 0.8     |
| Dermosoft®<br>Octiol                         | Caprylyl Glycol                                            | 0.2     |
| NaCl                                         | Sodium Chloride                                            | 1       |
| Dow Coring®<br>ES-5300<br>formulation<br>Aid | Lauryl PEG-10 Tris (trimethylsiloxy) silylethyl Dimethicon | 2       |
| KF-995                                       | Cyclopentasiloxane                                         | 20      |
| BF-1169                                      | C13-16 Isoparaffin, Dimethicone                            | 5       |

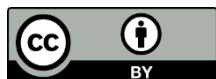

© 2020 by the authors. Submitted for possible open access publication under the terms and conditions of the Creative Commons Attribution (CC BY) license (<http://creativecommons.org/licenses/by/4.0/>).
